# Supplementary material for: Temporal Trends in Rates of Patient Harm Resulting from Medical Care
Source: Atypon-hosted journal article supplement (doi:10.1056/nejmsa1004404), 2010-11-24
Supplement: nejmsa1004404_appendix.pdf [file nejmsa1004404_appendix.pdf]

## Supplementary Appendix

This appendix has been provided by the authors to give readers additional information about their work.

Supplement to: Landrigan CP, Parry GJ, Bones CB, Hackbarth AD, Goldmann DA, Sharek PJ. Temporal trends in rates of patient harm resulting from medical care. *N Engl J Med* 2010;363:2124-34.

**Appendix: Examples of Preventable Harms, by NCC MERP Severity Category**

| Harm Level                                                                          | Example                                                                                                                                                        |
|-------------------------------------------------------------------------------------|----------------------------------------------------------------------------------------------------------------------------------------------------------------|
| E (Temporary harm to the patient and required intervention)                         | Woman experienced failure to progress during normal delivery. Vacuum extractor caused several lacerations requiring suturing.                                  |
|                                                                                     | Patient developed urinary tract infection due to prolonged catheter use, treated with antibiotics and subsequently discharged home.                            |
| F (Temporary Harm to the patient and required initial or prolonged hospitalization) | Patient experienced wound dehiscence and wound infection post-operatively, requiring return to operating room and prolonged hospital stay.                     |
|                                                                                     | Patient developed aspiration pneumonia secondary to sedation from excessive narcotic usage, leading to prolonged hospitalization.                              |
| G (Permanent patient harm)                                                          | During hospitalization, patient suffered a fall that resulted in hip dislocation and permanent sciatic nerve injury.                                           |
|                                                                                     | Patient developed a post-operative stroke and permanent neurologic deficits, attributed to delay in recognition of hypovolemia and hypotension.                |
| H (Intervention required to sustain life)                                           | Patient developed massive pleural effusion following technical error in placement of venous shunt, requiring emergent chest tube and return to operating room. |
|                                                                                     | Severe intra-operative bleeding required transfusion of multiple units of packed red blood cells and initiation of pressors to sustain patient's life.         |
| I (Patient death)                                                                   | Following a surgical procedure, patient had persistent bleeding and developed acute renal failure. He developed multi-system organ failure and died.           |
|                                                                                     | Patient developed aspiration pneumonia while in the hospital, progressing to sepsis and death.                                                                 |
